# Supplementary material for: Fine Particulate Matter Constituents and Cardiopulmonary Mortality in a Heavily Polluted Chinese City
Source: PubMed Central journal article supplement (PMC3295342; doi:10.1289/ehp.1103671), 2012-01-03
Supplement: ehp.1103671.s001.pdf [file ehp.1103671.s001.pdf]

**Supplemental Material**

**Fine Particulate Matter Constituents and Cardiopulmonary Mortality in a Heavily Polluted Chinese City**

Junji Cao, Hongmei Xu, Qun Xu, Bingheng Chen, Haidong Kan

**Supplemental Material, Figure 1: Page 3**

**Supplemental Material, Figure 2: Page 4**

**Supplemental Material, Figure 3: Page 5**

**Supplemental Material, Table 1: Pages 6**

**Supplemental Material, Table 2: Page 7**

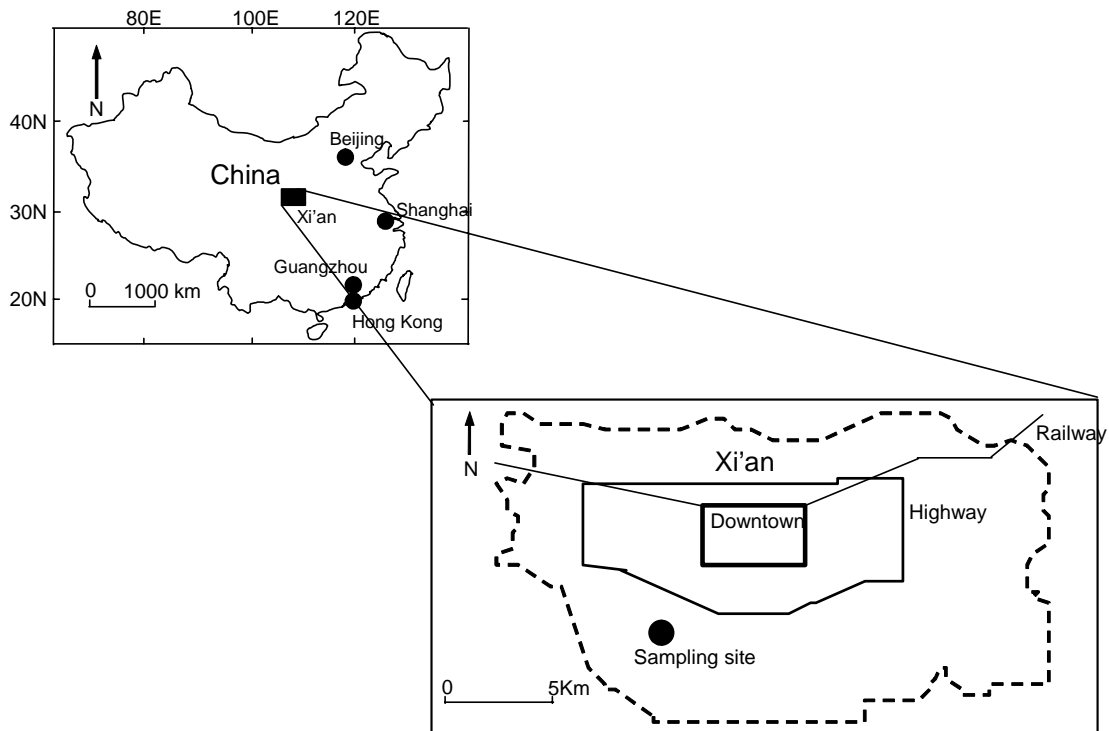

**Figure 1.** Location of sampling site of PM<sub>2.5</sub> in Xi'an. The study area is within the dotted line.

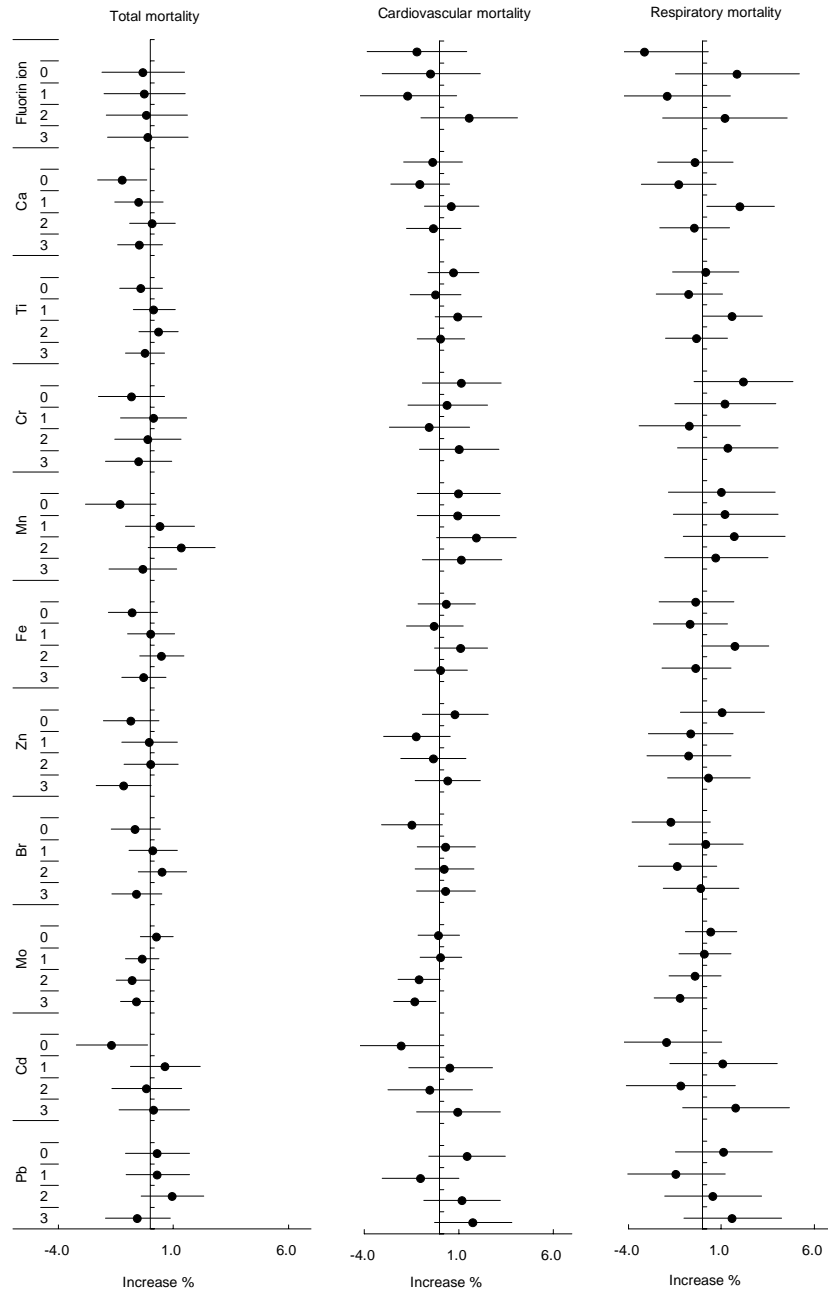

**Figure 2.** Estimated percent increase [mean (95% CI)] in mortality per IQR increase in pollutant concentrations on the current day (lag 0) or the previous 1-3 days (lags 1, 2 and 3), adjusted for temporal trend, day of the week, temperature, relative humidity, and SO<sub>2</sub> and NO<sub>2</sub> concentrations

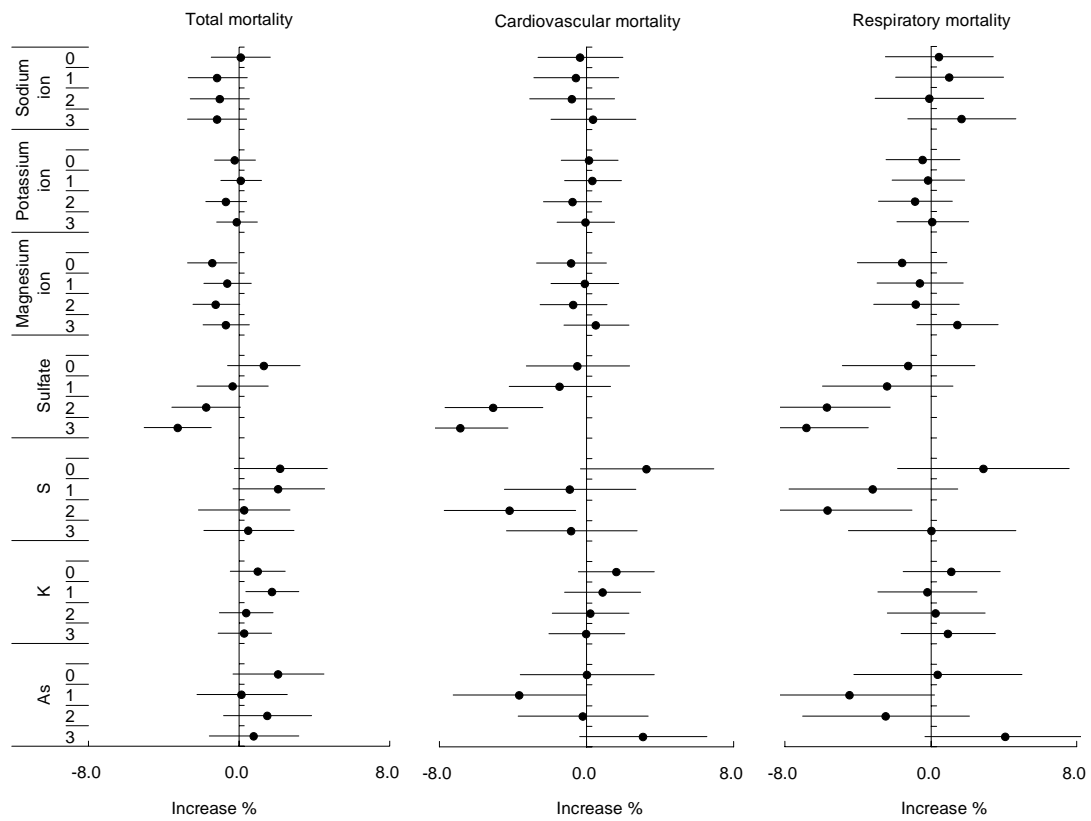

**Figure 3.** Estimated percent increase [mean (95% CI)] in mortality per IQR increase in pollutant concentrations on the current day (lag 0) or the previous 1-3 days (lags 1, 2 and 3), adjusted for  $PM_{2.5}$  mass, temporal trend, day of the week, temperature, relative humidity, and  $SO_2$  and  $NO_2$  concentrations

**Table 1.** Correlations among PM<sub>2.5</sub> mass and selected constituents

|                               | PM <sub>2.5</sub> | OC   | EC   | SO <sub>4</sub> <sup>2-</sup> | NO <sub>3</sub> <sup>-</sup> | S    | Cl   | K    | Ni   | Na <sup>+</sup> | NH <sub>4</sub> <sup>+</sup> | K <sup>+</sup> | Mg <sup>2+</sup> | Cl <sup>-</sup> |
|-------------------------------|-------------------|------|------|-------------------------------|------------------------------|------|------|------|------|-----------------|------------------------------|----------------|------------------|-----------------|
| PM <sub>2.5</sub>             | 1                 |      |      |                               |                              |      |      |      |      |                 |                              |                |                  |                 |
| OC                            | 0.70              | 1    |      |                               |                              |      |      |      |      |                 |                              |                |                  |                 |
| EC                            | 0.66              | 0.87 | 1    |                               |                              |      |      |      |      |                 |                              |                |                  |                 |
| SO <sub>4</sub> <sup>2-</sup> | 0.76              | 0.56 | 0.52 | 1                             |                              |      |      |      |      |                 |                              |                |                  |                 |
| NO <sub>3</sub> <sup>-</sup>  | 0.81              | 0.68 | 0.63 | 0.85                          | 1                            |      |      |      |      |                 |                              |                |                  |                 |
| S                             | 0.66              | 0.67 | 0.64 | 0.81                          | 0.76                         | 1    |      |      |      |                 |                              |                |                  |                 |
| Cl                            | 0.54              | 0.78 | 0.74 | 0.22                          | 0.40                         | 0.45 | 1    |      |      |                 |                              |                |                  |                 |
| K                             | 0.54              | 0.61 | 0.49 | 0.31                          | 0.39                         | 0.52 | 0.63 | 1    |      |                 |                              |                |                  |                 |
| Ni                            | 0.13              | 0.05 | 0.04 | 0.14                          | 0.10                         | 0.02 | 0.05 | 0.05 | 1    |                 |                              |                |                  |                 |
| Na <sup>+</sup>               | 0.33              | 0.20 | 0.10 | 0.28                          | 0.27                         | 0.22 | 0.32 | 0.29 | 0.28 | 1               |                              |                |                  |                 |
| NH <sub>4</sub> <sup>+</sup>  | 0.79              | 0.61 | 0.52 | 0.93                          | 0.89                         | 0.84 | 0.32 | 0.33 | 0.08 | 0.25            | 1                            |                |                  |                 |
| K <sup>+</sup>                | 0.67              | 0.61 | 0.48 | 0.63                          | 0.62                         | 0.65 | 0.49 | 0.80 | 0.20 | 0.19            | 0.63                         | 1              |                  |                 |
| Mg <sup>2+</sup>              | 0.52              | 0.45 | 0.43 | 0.26                          | 0.31                         | 0.27 | 0.46 | 0.70 | 0.25 | 0.40            | 0.17                         | 0.46           | 1                |                 |
| Cl <sup>-</sup>               | 0.75              | 0.83 | 0.74 | 0.47                          | 0.62                         | 0.49 | 0.88 | 0.63 | 0.11 | 0.34            | 0.53                         | 0.62           | 0.52             | 1               |

**Table 2.** Summary of statistically significant associations between injury mortality and PM<sub>2.5</sub> constituents with alternative pollutant lags (L) (numbers in the table indicate whether single lags of 0–3 days were statistically significant)

| Pollutants                                                                                                                                                                                                                                         | Before adjustment<br>for PM <sub>2.5</sub> mass | After adjustment for<br>PM <sub>2.5</sub> mass |
|----------------------------------------------------------------------------------------------------------------------------------------------------------------------------------------------------------------------------------------------------|-------------------------------------------------|------------------------------------------------|
| K <sup>+</sup>                                                                                                                                                                                                                                     | L1*                                             | -                                              |
| SO <sub>4</sub> <sup>2-</sup>                                                                                                                                                                                                                      | L2*                                             | -                                              |
| Cl <sup>-</sup>                                                                                                                                                                                                                                    | -                                               | L1*                                            |
| PM <sub>2.5</sub> mass, OC, EC, Na <sup>+</sup> , NH <sub>4</sub> <sup>+</sup> ,<br>Mg <sup>2+</sup> , NO <sub>3</sub> <sup>-</sup> , Ca <sup>2+</sup> , F <sup>-</sup> , NO <sub>2</sub> <sup>-</sup> , Ca, Ti,<br>Cr, Mn, Fe, Zn, Br, Mo, Cd, Pb | -                                               | -                                              |

\* p < 0.05
